# Supplementary material
Source: Springer Nature journal article supplement (https://www.springermedizin.de/resource/supplementary/13058_2008_2121_MOESM4_ESM.pdf/9700680)
Supplement: MOESM4 [file 9700680]

**Additional Data File 4 - Comparison two by two**

| Non Neoplastic x pure DCIS |          |                                     | Non Neoplastic x DCIS-IDC |          |                                                            | pure DCIS x DCIS-IDC |           |                                                                   |
|----------------------------|----------|-------------------------------------|---------------------------|----------|------------------------------------------------------------|----------------------|-----------|-------------------------------------------------------------------|
| GeneID                     | Symbol   | Description                         | GeneID                    | Symbol   | Description                                                | GeneID               | Symbol    | Description                                                       |
| 7402                       | UTRN     | utrophin (homologous to dystrophin) | 51061                     | TXNDC11  | thioredoxin domain containing 11                           | 64122                | FN3K      | fructosamine 3 kinase                                             |
| 9933                       | KIAA0020 | KIAA0020                            | Inputs not found          |          |                                                            | 4739                 | NEDD9     | neural precursor cell expressed, developmentally down-regulated 9 |
| Inputs not found           |          |                                     | 317762                    | C14orf65 | chromosome 14 open reading frame 65                        | 51061                | TXNDC11   | thioredoxin domain containing 11                                  |
| Inputs not found           |          |                                     | 7402                      | UTRN     | utrophin                                                   | 29965                | C16orf5   | chromosome 16 open reading frame 5                                |
| 51136                      | LOC51136 | PTD016 protein                      | 4140                      | MARK3    | MAP/microtubule affinity-regulating kinase 3               | 51093                | C1orf66   | chromosome 1 open reading frame 66                                |
| 317762                     | C14orf65 | chromosome 14 open reading frame 65 | 29965                     | C16orf5  | chromosome 16 open reading frame 5                         | 23154                | NCDN      | neurochondrin                                                     |
| 60686                      | C14orf93 | chromosome 14 open reading frame 93 | 64122                     | FN3K     | fructosamine 3 kinase                                      | 1140                 | CHRNB1    | cholinergic receptor, nicotinic, beta 1 (muscle)                  |
| Inputs not found           |          |                                     | 23154                     | NCDN     | neurochondrin                                              | 9486                 | CHST10    | carbohydrate sulfotransferase 10                                  |
|                            |          |                                     | 114881                    | OSBPL7   | oxysterol binding protein-like 7                           | Inputs not found     |           |                                                                   |
|                            |          |                                     | 1140                      | CHRNB1   | cholinergic receptor, nicotinic, beta 1 (muscle)           | 4140                 | MARK3     | MAP/microtubule affinity-regulating kinase 3                      |
|                            |          |                                     | 93624                     | MGC21874 | transcriptional adaptor 2 (ADA2 homolog, yeast)-beta       | 114881               | OSBPL7    | oxysterol binding protein-like 7                                  |
|                            |          |                                     | 10539                     | TXNL2    | thioredoxin-like 2                                         | 55917                | CTTNBP2NL | CTTNBP2 N-terminal like chromosome 14 open reading frame 65       |
|                            |          |                                     | Inputs not found          |          |                                                            | 317762               | C14orf65  | chromosome 14 open reading frame 65                               |
|                            |          |                                     | 55612                     | C20orf42 | chromosome 20 open reading frame 42                        | 93624                | MGC21874  | transcriptional adaptor 2 (ADA2 homolog, yeast)-beta              |
|                            |          |                                     | 23435                     | TARDBP   | TAR DNA binding protein chromosome 1 open reading frame 66 | Inputs not found     |           |                                                                   |
|                            |          |                                     | 51093                     | C1orf66  | chromosome 1 open reading frame 66                         | 53615                | MBD3      | methyl-CpG binding domain protein 3                               |

|                  |           |                                                                   |                  |          |                                                              |
|------------------|-----------|-------------------------------------------------------------------|------------------|----------|--------------------------------------------------------------|
| 4739             | NEDD9     | neural precursor cell expressed, developmentally down-regulated 9 | 3394             | IRF8     | interferon regulatory factor 8                               |
| 23034            | SAMD4A    | sterile alpha motif domain containing 4A                          | 57605            | PITPNM2  | phosphatidylinositol transfer protein, membrane-associated 2 |
| 57605            | PITPNM2   | phosphatidylinositol transfer protein, membrane-associated 2      | 55612            | C20orf42 | chromosome 20 open reading frame 42                          |
| 55917            | CTTNBP2NL | CTTNBP2 N-terminal like                                           | 10539            | TXNL2    | thioredoxin-like 2                                           |
| 9580             | SOX13     | SRY (sex determining region Y)-box 13                             | 23203            | PMPCA    | peptidase (mitochondrial processing) alpha                   |
| 9486             | CHST10    | carbohydrate sulfotransferase 10                                  | 23034            | SAMD4A   | sterile alpha motif domain containing 4A                     |
| 6122             | RPL3      | ribosomal protein L3                                              | 26301            | GBGT1    | globoside alpha-1,3-N-acetylgalactosaminyl transferase 1     |
| 54838            | C10orf26  | chromosome 10 open reading frame 26                               | 54838            | C10orf26 | chromosome 10 open reading frame 26                          |
| 2219             | FCN1      | ficolin (collagen/fibrinogen domain containing) 1                 | 23435            | TARDBP   | TAR DNA binding protein                                      |
| 3394             | IRF8      | interferon regulatory factor 8                                    | 6122             | RPL3     | ribosomal protein L3                                         |
| 9933             | KIAA0020  | KIAA0020                                                          | Inputs not found |          |                                                              |
| 53615            | MBD3      | methyl-CpG binding domain protein 3                               | 23085            | ERC1     | ELKS/RAB6-interacting/CAST family member 1                   |
| Inputs not found |           |                                                                   | 7840             | ALMS1    | Alstrom syndrome 1                                           |
| 23277            | KIAA0664  | KIAA0664                                                          | 2219             | FCN1     | ficolin (collagen/fibrinogen domain containing) 1            |
| 23085            | ERC1      | ELKS/RAB6-interacting/CAST family member 1                        | 5184             | PEPD     | peptidase D                                                  |
| 54716            | SLC6A20   | solute carrier family 6 (proline IMINO transporter), member 20    | 7402             | UTRN     | utrophin                                                     |

|                  |          |                                                                    |                  |          |                                                                    |
|------------------|----------|--------------------------------------------------------------------|------------------|----------|--------------------------------------------------------------------|
| 5184             | PEPD     | peptidase D                                                        | 5920             | RARRES3  | retinoic acid receptor responder (tazarotene induced) 3            |
| 26301            | GBGT1    | globoside alpha-1,3-N-acetylgalactosaminyltransferase 1            | 80700            | UBXD1    | UBX domain containing 1                                            |
| 8676             | STX11    | syntaxin 11                                                        | 55614            | C20orf23 | chromosome 20 open reading frame 23                                |
| Inputs not found |          |                                                                    | 9580             | SOX13    | SRY (sex determining region Y)-box 13                              |
| 55614            | C20orf23 | chromosome 20 open reading frame 23                                | Inputs not found |          |                                                                    |
| 3689             | ITGB2    | integrin, beta 2 (complement component 3 receptor 3 and 4 subunit) | 54716            | SLC6A20  | solute carrier family 6 (proline IMINO transporter), member 20     |
| 9985             | REC8     | REC8 homolog (yeast)                                               | 23543            | RBM9     | RNA binding motif protein 9                                        |
| 5920             | RARRES3  | retinoic acid receptor responder (tazarotene induced) 3            | Inputs not found |          |                                                                    |
| 719              | C3AR1    | complement component 3a receptor 1                                 | 10131            | TRAP1    | TNF receptor-associated protein 1                                  |
| Inputs not found |          |                                                                    | 23277            | KIAA0664 | KIAA0664                                                           |
| 7840             | ALMS1    | Alstrom syndrome 1                                                 | 3310             | HSPA6    | heat shock 70kDa protein 6 (HSP70B')                               |
| 23543            | RBM9     | RNA binding motif protein 9                                        | 9985             | REC8     | REC8 homolog (yeast)                                               |
| Inputs not found |          |                                                                    | 55081            | IFT57    | intraflagellar transport 57 homolog (Chlamydomonas)                |
| Inputs not found |          |                                                                    | Inputs not found |          |                                                                    |
| 6853             | SYN1     | synapsin I                                                         | 3689             | ITGB2    | integrin, beta 2 (complement component 3 receptor 3 and 4 subunit) |
| 23203            | PMPCA    | peptidase (mitochondrial processing) alpha                         | 80271            | ITPKC    | inositol 1,4,5-trisphosphate 3-kinase C                            |
| Inputs not found |          |                                                                    | 9404             | LPXN     | leupaxin                                                           |
| 9404             | LPXN     | leupaxin                                                           | 8676             | STX11    | syntaxin 11                                                        |

|                  |          |                                                                |                  |         |                                                                                             |
|------------------|----------|----------------------------------------------------------------|------------------|---------|---------------------------------------------------------------------------------------------|
| 51136            | LOC51136 | PTD016 protein                                                 | 27340            | UTP20   | UTP20, small subunit (SSU) processome component, homolog (yeast)                            |
| 60686            | C14orf93 | chromosome 14 open reading frame 93                            | Inputs not found |         |                                                                                             |
| 55081            | IFT57    | intraflagellar transport 57 homolog (Chlamydomonas)            | 60625            | DHX35   | DEAH (Asp-Glu-Ala-His) box polypeptide 35                                                   |
| 2057             | EPOR     | erythropoietin receptor                                        | 719              | C3AR1   | complement component 3a receptor 1                                                          |
| 3310             | HSPA6    | heat shock 70kDa protein 6 (HSP70B')                           | 57575            | PCDH10  | protocadherin 10                                                                            |
| 27236            | ARFIP1   | ADP-ribosylation factor interacting protein 1 (arfaptin 1)     | 7353             | UFD1L   | ubiquitin fusion degradation 1 like (yeast)                                                 |
| 80271            | ITPKC    | inositol 1,4,5-trisphosphate 3-kinase C                        | 5034             | P4HB    | procollagen-proline, 2-oxoglutarate 4-dioxygenase (proline 4-hydroxylase), beta polypeptide |
| Inputs not found |          |                                                                | 2057             | EPOR    | erythropoietin receptor                                                                     |
| 761              | CA3      | carbonic anhydrase III, muscle specific                        | 6853             | SYN1    | synapsin I                                                                                  |
| 2214             | FCGR3A   | Fc fragment of IgG, low affinity IIIa, receptor (CD16a)        | Inputs not found |         |                                                                                             |
| 6596             | HLTF     | helicase-like transcription factor                             | Inputs not found |         |                                                                                             |
| 57575            | PCDH10   | protocadherin 10                                               | Inputs not found |         |                                                                                             |
| 1300             | COL10A1  | collagen, type X, alpha 1(Schmid metaphyseal chondrodysplasia) | 160760           | PPTC7   | PTC7 protein phosphatase homolog (S. cerevisiae)                                            |
| 64333            | ARHGAP9  | Rho GTPase activating protein 9                                | 64333            | ARHGAP9 | Rho GTPase activating protein 9                                                             |

|       |          |                                                                   |                  |          |                                                          |
|-------|----------|-------------------------------------------------------------------|------------------|----------|----------------------------------------------------------|
| 57464 | FAM40B   | family with sequence similarity 40, member B                      | 8318             | CDC45L   | CDC45 cell division cycle 45-like (S. cerevisiae)        |
| 1386  | ATF2     | activating transcription factor 2                                 | 9933             | KIAA0020 | KIAA0020                                                 |
| 27340 | UTP20    | UTP20, small subunit (SSU) processome component, homolog (yeast)  | Inputs not found |          |                                                          |
| 54825 | PCLKC    | protocadherin LKC                                                 | 6596             | HLTF     | helicase-like transcription factor                       |
| 6464  | SHC1     | SHC (Src homology 2 domain containing) transforming protein 1     | 820              | CAMP     | cathelicidin antimicrobial peptide                       |
| 9685  | CLINT1   | clathrin interactor 1                                             | 9925             | ZBTB5    | zinc finger and BTB domain containing 5                  |
| 9899  | SV2B     | synaptic vesicle glycoprotein 2B                                  | 123              | ADFP     | adipose differentiation-related protein                  |
| 60625 | DHX35    | DEAH (Asp-Glu-Ala-His) box polypeptide 35                         | 57464            | FAM40B   | family with sequence similarity 40, member B             |
| 84986 | ARHGAP19 | Rho GTPase activating protein 19                                  | Inputs not found |          |                                                          |
| 7353  | UFD1L    | ubiquitin fusion degradation 1 like (yeast)                       | 54825            | PCLKC    | protocadherin LKC                                        |
| 10131 | TRAP1    | TNF receptor-associated protein 1                                 | 4054             | LTBP3    | latent transforming growth factor beta binding protein 3 |
| 10464 | C13orf24 | chromosome 13 open reading frame 24                               | 10755            | GIPC1    | GIPC PDZ domain containing family, member 1              |
| 5523  | PPP2R3A  | protein phosphatase 2 (formerly 2A), regulatory subunit B", alpha | 547              | KIF1A    | kinesin family member 1A                                 |
| 590   | BCHE     | butyrylcholinesterase                                             | 2214             | FCGR3A   | Fc fragment of IgG, low affinity IIIa, receptor (CD16a)  |

|                  |          |                                                                     |                  |          |                                                                     |
|------------------|----------|---------------------------------------------------------------------|------------------|----------|---------------------------------------------------------------------|
| 57631            | LRCH2    | leucine-rich repeats and calponin homology (CH) domain containing 2 |                  |          |                                                                     |
| 8318             | CDC45L   | CDC45 cell division cycle 45-like (S. cerevisiae)                   | 10982            | MAPRE2   | microtubule-associated protein, RP/EB family, member 2              |
| Inputs not found |          |                                                                     | 590              | BCHE     | butyrylcholinesterase                                               |
| 10762            | NUP50    | nucleoporin 50kDa                                                   | 25983            | NGDN     | neuroguidin, EIF4E binding protein                                  |
| 54894            | RNF43    | ring finger protein 43                                              | 27236            | ARFIP1   | ADP-ribosylation factor interacting protein 1 (arfaptin 1)          |
| 51411            | BIN2     | bridging integrator 2                                               | 3791             | KDR      | kinase insert domain receptor (a type III receptor tyrosine kinase) |
| 160760           | PPTC7    | PTC7 protein phosphatase homolog (S. cerevisiae)                    | 6464             | SHC1     | SHC (Src homology 2 domain containing) transforming protein 1       |
| 820              | CAMP     | cathelicidin antimicrobial peptide                                  | Inputs not found |          |                                                                     |
| 80700            | UBXD1    | UBX domain containing 1                                             | 1308             | COL17A1  | collagen, type XVII, alpha 1                                        |
| 25999            | CLIP3    | CAP-GLY domain containing linker protein 3                          | 9685             | CLINT1   | clathrin interactor 1                                               |
| 3791             | KDR      | kinase insert domain receptor (a type III receptor tyrosine kinase) | 10762            | NUP50    | nucleoporin 50kDa                                                   |
| 9840             | KIAA0748 | KIAA0748                                                            | 10464            | C13orf24 | chromosome 13 open reading frame 24                                 |
| 10324            | KBTBD10  | kelch repeat and BTB (POZ) domain containing 10                     | 5523             | PPP2R3A  | protein phosphatase 2 (formerly 2A), regulatory subunit B", alpha   |
| 26156            | RSL1D1   | ribosomal L1 domain containing 1                                    | Inputs not found |          |                                                                     |
| 8218             | CLTCL1   | clathrin, heavy chain-like 1                                        | 79758            | DHRS12   | dehydrogenase/reductase (SDR family) member 12                      |
| Inputs not found |          |                                                                     | 9063             | PIAS2    | protein inhibitor of activated STAT, 2                              |

|                  |           |                                                                             |                  |          |                                                                          |
|------------------|-----------|-----------------------------------------------------------------------------|------------------|----------|--------------------------------------------------------------------------|
| 547              | KIF1A     | kinesin family member 1A                                                    | 10324            | KBTBD10  | kelch repeat and BTB (POZ) domain containing 10                          |
| Inputs not found |           |                                                                             | 677              | ZFP36L1  | zinc finger protein 36, C3H type-like 1                                  |
| 25847            | ANAPC13   | anaphase promoting complex subunit 13                                       | 9840             | KIAA0748 | KIAA0748                                                                 |
| 285704           | RGMB      | RGM domain family, member B                                                 | 8895             | CPNE3    | copine III                                                               |
| 9063             | PIAS2     | protein inhibitor of activated STAT, 2                                      | 57631            | LRCH2    | leucine-rich repeats and calponin homology (CH) domain containing 2      |
| 7113             | TMPRSS2   | transmembrane protease, serine 2                                            | 81566            | FAM130A1 | family with sequence similarity 130, member A1                           |
| 84059            | GPR98     | G protein-coupled receptor 98                                               | 6553             | SLC9A5   | solute carrier family 9 (sodium/hydrogen exchanger), member 5            |
| 10979            | PLEKHC1   | pleckstrin homology domain containing, family C (with FERM domain) member 1 | Inputs not found |          |                                                                          |
| 79758            | DHRS12    | dehydrogenase/reductase (SDR family) member 12                              | 285704           | RGMB     | RGM domain family, member B                                              |
| 857              | CAV1      | caveolin 1, caveolae protein, 22kDa                                         |                  |          |                                                                          |
| Inputs not found |           |                                                                             | 55624            | POMGNT1  | protein O-linked mannose beta1,2-N-acetylglucosaminyltransferase         |
| 8987             | GENX-3414 | genethonin 1                                                                | 9806             | SPOCK2   | sparc/osteonectin, cwcv and kazal-like domains proteoglycan (testican) 2 |
| 1522             | CTSZ      | cathepsin Z                                                                 | 54894            | RNF43    | ring finger protein 43                                                   |
| 81566            | FAM130A1  | family with sequence similarity 130, member A1                              | 55224            | ETNK2    | ethanolamine kinase 2                                                    |

|                  |        |                                                                                    |       |          |                                                  |
|------------------|--------|------------------------------------------------------------------------------------|-------|----------|--------------------------------------------------|
| 25983            | NGDN   | neuroguidin, EIF4E binding protein                                                 | 51373 | MRPS17   | mitochondrial ribosomal protein S17              |
| 9925             | ZBTB5  | zinc finger and BTB domain containing 5                                            | 51136 | LOC51136 | PTD016 protein                                   |
| 4054             | LTBP3  | latent transforming growth factor beta binding protein 3                           | 60686 | C14orf93 | chromosome 14 open reading frame 93              |
| 57226            | LYRM2  | LYR motif containing 2                                                             | 1522  | CTSZ     | cathepsin Z                                      |
| 1880             | EBI2   | Epstein-Barr virus induced gene 2 (lymphocyte-specific G protein coupled receptor) | 84059 | GPR98    | G protein-coupled receptor 98                    |
| 123              | ADFP   | adipose differentiation-related protein                                            | 9899  | SV2B     | synaptic vesicle glycoprotein 2B                 |
| 83892            | KCTD10 | potassium channel tetramerisation domain containing 10                             | 84986 | ARHGAP19 | Rho GTPase activating protein 19                 |
| 1153             | CIRBP  | cold inducible RNA binding protein                                                 | 25847 | ANAPC13  | anaphase promoting complex subunit 13            |
| 1374             | CPT1A  | carnitine palmitoyltransferase 1A (liver)                                          | 761   | CA3      | carbonic anhydrase III, muscle specific          |
| 51373            | MRPS17 | mitochondrial ribosomal protein S17                                                | 23061 | TBC1D9B  | TBC1 domain family, member 9B (with GRAM domain) |
| 10494            | STK25  | serine/threonine kinase 25 (STE20 homolog, yeast)                                  | 54617 | INOC1    | INO80 complex homolog 1 (S. cerevisiae)          |
| Inputs not found |        |                                                                                    | 23246 | BOP1     | block of proliferation 1                         |
|                  |        |                                                                                    | 857   | CAV1     | caveolin 1, caveolae protein, 22kDa              |
| 23552            | CCRK   | cell cycle related kinase                                                          | 51411 | BIN2     | bridging integrator 2                            |
|                  |        |                                                                                    | 2139  | EYA2     | eyes absent homolog 2 (Drosophila)               |
| 55224            | ETNK2  | ethanolamine kinase 2                                                              | 1386  | ATF2     | activating transcription factor 2                |

|                  |         |                                                                                             |                  |         |                                                                                       |
|------------------|---------|---------------------------------------------------------------------------------------------|------------------|---------|---------------------------------------------------------------------------------------|
| 10982            | MAPRE2  | microtubule-associated protein, RP/EB family, member 2                                      | 8218             | CLTCL1  | clathrin, heavy chain-like 1                                                          |
| Inputs not found |         |                                                                                             | 1374             | CPT1A   | carnitine palmitoyltransferase 1A (liver)                                             |
| 26504            | CNNM4   | cyclin M4                                                                                   | 10979            | PLEKHC1 | pleckstrin homology domain containing, family C (with FERM domain) member 1           |
| 54617            | INOC1   | INO80 complex homolog 1 (S. cerevisiae)                                                     | 579              | BAPX1   | bagpipe homeobox homolog 1 (Drosophila)                                               |
| 5034             | P4HB    | procollagen-proline, 2-oxoglutarate 4-dioxygenase (proline 4-hydroxylase), beta polypeptide | 9927             | MFN2    | mitofusin 2                                                                           |
| 55230            | USP40   | ubiquitin specific peptidase 40                                                             | 1153             | CIRBP   | cold inducible RNA binding protein                                                    |
| 6813             | STXBP2  | syntaxin binding protein 2                                                                  | 57460            | PPM1H   | protein phosphatase 1H (PP2C domain containing)                                       |
| 83543            | C9orf58 | chromosome 9 open reading frame 58                                                          | 57226            | LYRM2   | LYR motif containing 2                                                                |
| 65010            | SLC26A6 | solute carrier family 26, member 6                                                          | 26156            | RSL1D1  | ribosomal L1 domain containing 1                                                      |
| 30827            | CXXC1   | CXXC finger 1 (PHD domain)                                                                  | 10494            | STK25   | serine/threonine kinase 25 (STE20 homolog, yeast)                                     |
| 5066             | PAM     | peptidylglycine alpha-amidating monoxygenase                                                | Inputs not found |         |                                                                                       |
| Inputs not found |         |                                                                                             | 79017            | C7orf24 | chromosome 7 open reading frame 24                                                    |
| 677              | ZFP36L1 | zinc finger protein 36, C3H type-like 1                                                     | 6035             | RNASE1  | ribonuclease, RNase A family, 1 (pancreatic)                                          |
| 112483           | SAT2    | spermidine/spermine N1-acetyltransferase 2                                                  | 84246            | MED10   | mediator of RNA polymerase II transcription, subunit 10 homolog (NUT2, S. cerevisiae) |

|       |          |                                                                          |                  |          |                                                                                          |
|-------|----------|--------------------------------------------------------------------------|------------------|----------|------------------------------------------------------------------------------------------|
| 57460 | PPM1H    | protein phosphatase 1H (PP2C domain containing)                          | 6421             | SFPQ     | splicing factor proline/glutamine-rich (polypyrimidine tract binding protein associated) |
| 54809 | SAMD9    | sterile alpha motif domain containing 9                                  | Inputs not found |          |                                                                                          |
| 57326 | PBXIP1   | pre-B-cell leukemia homeobox interacting protein 1                       | 57482            | KIAA1211 | KIAA1211 protein                                                                         |
| 10755 | GIPC1    | GIPC PDZ domain containing family, member 1                              | 51155            | HN1      | hematological and neurological expressed 1                                               |
| 1456  | CSNK1G3  | casein kinase 1, gamma 3                                                 | Inputs not found |          |                                                                                          |
| 9806  | SPOCK2   | sparc/osteonectin, cwcv and kazal-like domains proteoglycan (testican) 2 | 6498             | SKIL     | SKI-like oncogene                                                                        |
| 714   | C1QC     | complement component 1, q subcomponent, C chain                          | 8031             | NCOA4    | nuclear receptor coactivator 4                                                           |
| 23246 | BOP1     | block of proliferation 1                                                 | 50507            | NOX4     | NADPH oxidase 4                                                                          |
| 55624 | POMGNT1  | protein O-linked mannose beta1,2 N-acetylglucosaminyltransferase         | 22948            | CCT5     | chaperonin containing TCP1, subunit 5 (epsilon)                                          |
| 6553  | SLC9A5   | solute carrier family 9 (sodium/hydrogen exchanger), member 5            | 80209            | C13orf23 | chromosome 13 open reading frame 23                                                      |
| 6608  | SMO      | smoothened homolog (Drosophila)                                          | 10745            | PHTF1    | putative homeodomain transcription factor 1                                              |
| 23061 | TBC1D9B  | TBC1 domain family, member 9B (with GRAM domain)                         | 220972           | 8-Mar    | membrane-associated ring finger (C3HC4) 8                                                |
| 64115 | C10orf54 | chromosome 10 open reading frame 54                                      | 9766             | KIAA0247 | KIAA0247                                                                                 |

|                  |          |                                                           |        |        |                                                                                                |
|------------------|----------|-----------------------------------------------------------|--------|--------|------------------------------------------------------------------------------------------------|
| 6014             | RIT2     | Ras-like without CAAX 2                                   | 1501   | CTNND2 | catenin (cadherin-associated protein), delta 2 (neural plakophilin-related arm-repeat protein) |
| 10174            | SORBS3   | sorbin and SH3 domain containing 3                        | 4283   | CXCL9  | chemokine (C-X-C motif) ligand 9                                                               |
| Inputs not found |          |                                                           | 146923 | RUNDC1 | RUN domain containing 1                                                                        |
| Inputs not found |          |                                                           | 58155  | PTBP2  | polypyrimidine tract binding protein 2                                                         |
| 9658             | ZNF516   | zinc finger protein 516                                   |        |        |                                                                                                |
| 80325            | ABTB1    | ankyrin repeat and BTB (POZ) domain containing 1          | 23603  | CORO1C | coronin, actin binding protein, 1C                                                             |
| 1607             | DGKB     | diacylglycerol kinase, beta 90kDa                         | 23213  | SULF1  | sulfatase 1                                                                                    |
| 5653             | KLK6     | kallikrein-related peptidase 6                            | 10874  | NMU    | neuromedin U                                                                                   |
| 79876            | UBE1DC1  | ubiquitin-activating enzyme E1-domain containing 1        |        |        |                                                                                                |
| 8895             | CPNE3    | copine III                                                |        |        |                                                                                                |
| 400              | ARL1     | ADP-ribosylation factor-like 1                            |        |        |                                                                                                |
| 64376            | IKZF5    | IKAROS family zinc finger 5 (Pegasus)                     |        |        |                                                                                                |
| 23351            | KIAA0323 | KIAA0323                                                  |        |        |                                                                                                |
| 23316            | CUTL2    | cut-like 2 (Drosophila)                                   |        |        |                                                                                                |
| 2139             | EYA2     | eyes absent homolog 2 (Drosophila)                        |        |        |                                                                                                |
| 2926             | GRSF1    | G-rich RNA sequence binding factor 1                      |        |        |                                                                                                |
| 150465           | TTL      | tubulin tyrosine ligase                                   |        |        |                                                                                                |
| 8031             | NCOA4    | nuclear receptor coactivator 4                            |        |        |                                                                                                |
| 1892             | ECHS1    | enoyl Coenzyme A hydratase, short chain, 1, mitochondrial |        |        |                                                                                                |

|        |          |                                                                                       |
|--------|----------|---------------------------------------------------------------------------------------|
| 23788  | MTCH2    | mitochondrial carrier homolog 2 (C. elegans)                                          |
| 84173  | RBED1    | RNA binding motif and ELMO/CED-12 domain 1                                            |
| 57482  | KIAA1211 | KIAA1211 protein                                                                      |
| 10745  | PHTF1    | putative homeodomain transcription factor 1                                           |
| 84246  | MED10    | mediator of RNA polymerase II transcription, subunit 10 homolog (NUT2, S. cerevisiae) |
| 51422  | PRKAG2   | protein kinase, AMP-activated, gamma 2 non-catalytic subunit                          |
| 80209  | C13orf23 | chromosome 13 open reading frame 23                                                   |
| 79009  | DDX50    | DEAD (Asp-Glu-Ala-Asp) box polypeptide 50                                             |
| 6732   | SRPK1    | SFRS protein kinase 1                                                                 |
| 2992   | GYG1     | glycogenin 1                                                                          |
| 6821   | SUOX     | sulfite oxidase                                                                       |
| 8880   | FUBP1    | far upstream element (FUSE) binding protein 1                                         |
| 23413  | FREQ     | frequenin homolog (Drosophila)                                                        |
| 55315  | SLC29A3  | solute carrier family 29 (nucleoside transporters), member 3                          |
| 58155  | PTBP2    | polypyrimidine tract binding protein 2                                                |
| 1479   | CSTF3    | cleavage stimulation factor, 3' pre-RNA, subunit 3, 77kDa                             |
| 246243 | RNASEH1  | ribonuclease H1                                                                       |

|        |          |                                                                                |
|--------|----------|--------------------------------------------------------------------------------|
| 6809   | STX3     | syntaxin 3                                                                     |
| 23463  | ICMT     | isoprenylcysteine<br>carboxyl<br>methyltransferase                             |
| 23412  | COMMD3   | COMM domain<br>containing 3                                                    |
| 50507  | NOX4     | NADPH oxidase<br>4                                                             |
| 4283   | CXCL9    | chemokine (C-X-<br>C motif) ligand 9                                           |
| 813    | CALU     | calumenin                                                                      |
| 60559  | SPCS3    | signal peptidase<br>complex subunit<br>3 homolog (S.<br>cerevisiae)            |
| 26115  | TANC2    | tetratricopeptide<br>repeat, ankyrin<br>repeat and coiled<br>coil containing 2 |
| 11164  | NUDT5    | nudix (nucleoside<br>diphosphate<br>linked moiety X)-<br>type motif 5          |
| 23603  | CORO1C   | coronin, actin<br>binding protein,<br>1C                                       |
| 51155  | HN1      | hematological<br>and neurological<br>expressed 1                               |
| 220972 | 8-Mar    | membrane-<br>associated ring<br>finger (C3HC4) 8                               |
| 79017  | C7orf24  | chromosome 7<br>open reading<br>frame 24                                       |
| 22948  | CCT5     | chaperonin<br>containing TCP1,<br>subunit 5<br>(epsilon)                       |
| 23213  | SULF1    | sulfatase 1                                                                    |
| 146923 | RUNDC1   | RUN domain<br>containing 1                                                     |
| 6498   | SKIL     | SKI-like<br>oncogene                                                           |
| 9766   | KIAA0247 | KIAA0247                                                                       |
| 10874  | NMU      | neuromedin U                                                                   |
